# Supplementary material for: EpiMCI: Predicting Multi-Way Chromatin Interactions from Epigenomic Signals
Source: MDPI journal article supplement (doi:10.3390/biology12091203), 2023-09-03
Supplement: s1 [file s1]

# EpiMCI: Predicting Multi-Way Chromatin Interactions from Epigenomic Signals

Jinsheng Xu <sup>1,†</sup>, Ping Zhang <sup>1,†</sup>, Weicheng Sun <sup>1</sup>, Junying Zhang <sup>1</sup>, Wenxue Zhang <sup>2</sup>, Chunhui Hou <sup>3,\*</sup> and Li Li <sup>1,4,\*</sup>

<sup>1</sup>Hubei Key Laboratory of Agricultural Bioinformatics, College of Informatics, Huazhong Agricultural University, Wuhan 430070, China

<sup>2</sup>Food Science Program, Division of Food, Nutrition and Exercise Sciences, University of Missouri, 1406 E Rollins Street, Columbia, MO 65211, USA

<sup>3</sup>China State Key Laboratory of Genetic Resources and Evolution, Kunming Institute of Zoology, Chinese Academy of Sciences, Kunming 650223, China

<sup>4</sup>Hubei Hongshan Laboratory, Huazhong Agricultural University, Wuhan 430074, China

\* Correspondence: houchunhui@mail.kiz.ac.cn (C.H.); li.li@mail.hzau.edu.cn (L.L.)

† These authors contributed equally to this work.

**Table S1. Hyperedges in GM12878/K562 HiPore-C datasets.**

|            | GM12878        |                |                |                | K562           |                |                |                |
|------------|----------------|----------------|----------------|----------------|----------------|----------------|----------------|----------------|
| Freq       | 3              | 4              | 5              | 6              | 3              | 4              | 5              | 6              |
| <b>2+</b>  | 25,499,786     | 4,732,929      | 3,892,251      | 3,793,817      | 45,000,094     | 12,001,359     | 15,590,988     | 20,780,406     |
| <b>3+</b>  | 6,627,056      | 1,086,686      | <b>680,758</b> | <b>412,131</b> | 10,776,737     | 3,915,725      | 4,314,851      | 3,916,687      |
| <b>4+</b>  | 3,440,588      | <b>604,243</b> | 385,150        | 241,428        | 5,012,706      | 2,400,526      | 2,484,406      | 2,226,432      |
| <b>5+</b>  | 2,358,800      | 402,027        | 266,881        | 168,281        | 3,221,949      | 1,675,365      | 1,676,680      | 1518,271       |
| <b>6+</b>  | 1,794,906      | 294,301        | 203,797        | 126,908        | 2,384,748      | 1,255,113      | 1,237,340      | 1,140,987      |
| <b>7+</b>  | 1,431,160      | 228,960        | 165,148        | 100,397        | 1,889,167      | 984,958        | 967,584        | 910,446        |
| <b>8+</b>  | 1,173,726      | 186,196        | 139,070        | 82,053         | 1,554,394      | 799,234        | 788,817        | 755,723        |
| <b>9+</b>  | 980,180        | 156,352        | 120,021        | 68,503         | 1,310,852      | <b>665,728</b> | <b>662,930</b> | <b>645,731</b> |
| <b>10+</b> | 831,098        | 134,635        | 105,349        | 58,104         | 1,125,334      | 566,031        | 570,192        | 562,820        |
| <b>11+</b> | 712,168        | 118,236        | 93,786         | 49,977         | 978,874        | 489,797        | 499,482        | 498,795        |
| <b>12+</b> | <b>615,731</b> | 105,116        | 84,354         | 43,619         | 860,682        | 429,107        | 443,789        | 447,641        |
| <b>13+</b> | 537,270        | 94,756         | 76,596         | 38,490         | 762,378        | 379,914        | 399,338        | 405,477        |
| <b>14+</b> | 471,313        | 86,356         | 70,065         | 34,263         | <b>681,028</b> | 340,137        | 362,757        | 370,379        |
| <b>15+</b> | 416,070        | 79,252         | 64,493         | 30,755         | 612,156        | 306,697        | 332,438        | 340,312        |

**Table S2. EpiMCI performance and comparison with MATCHA.**

| Cell line | Model  | Order | AUC   | AUPR  | Acc   | Precision | Recall | F1    |
|-----------|--------|-------|-------|-------|-------|-----------|--------|-------|
| GM12878   | EpiMCI | All   | 0.981 | 0.938 | 0.934 | 0.836     | 0.920  | 0.876 |
|           |        | 3     | 0.953 | 0.859 | 0.873 | 0.682     | 0.917  | 0.782 |
|           |        | 4     | 0.976 | 0.919 | 0.931 | 0.841     | 0.894  | 0.867 |
|           |        | 5     | 0.983 | 0.942 | 0.957 | 0.916     | 0.911  | 0.913 |
|           |        | 6     | 0.989 | 0.973 | 0.978 | 0.956     | 0.957  | 0.956 |
|           | MATCHA | All   | 0.958 | 0.913 | 0.912 | 0.825     | 0.904  | 0.863 |
|           |        | 3     | 0.930 | 0.813 | 0.845 | 0.649     | 0.872  | 0.744 |
|           |        | 4     | 0.945 | 0.902 | 0.914 | 0.816     | 0.865  | 0.840 |
|           |        | 5     | 0.958 | 0.931 | 0.936 | 0.895     | 0.891  | 0.893 |
|           |        | 6     | 0.961 | 0.952 | 0.954 | 0.932     | 0.924  | 0.928 |
| K562      | EpiMCI | All   | 0.984 | 0.947 | 0.953 | 0.845     | 0.939  | 0.889 |
|           |        | 3     | 0.956 | 0.848 | 0.892 | 0.751     | 0.868  | 0.805 |
|           |        | 4     | 0.975 | 0.921 | 0.943 | 0.862     | 0.904  | 0.882 |
|           |        | 5     | 0.987 | 0.946 | 0.961 | 0.925     | 0.918  | 0.921 |
|           |        | 6     | 0.991 | 0.976 | 0.983 | 0.963     | 0.961  | 0.962 |
|           | MATCHA | All   | 0.962 | 0.922 | 0.916 | 0.832     | 0.912  | 0.870 |
|           |        | 3     | 0.934 | 0.834 | 0.858 | 0.734     | 0.862  | 0.793 |
|           |        | 4     | 0.951 | 0.916 | 0.920 | 0.828     | 0.856  | 0.842 |
|           |        | 5     | 0.963 | 0.937 | 0.939 | 0.903     | 0.896  | 0.899 |
|           |        | 6     | 0.968 | 0.956 | 0.957 | 0.938     | 0.927  | 0.932 |

**Table S3. Epigenomic signals used for EpiMCI prediction.**

| Cell lines | Feature numbers | Proteins                                                                                                                                                                                                                                                                                                                                                                                                                                                                                                                                                                                                                                                                                                                                                                                                                                                                                                                         |
|------------|-----------------|----------------------------------------------------------------------------------------------------------------------------------------------------------------------------------------------------------------------------------------------------------------------------------------------------------------------------------------------------------------------------------------------------------------------------------------------------------------------------------------------------------------------------------------------------------------------------------------------------------------------------------------------------------------------------------------------------------------------------------------------------------------------------------------------------------------------------------------------------------------------------------------------------------------------------------|
| GM12878    | 132             | ARID3A, ARNT, ASH2L, ATF2, BACH1, BATF, BCL11A, BCL3, BHLHE40, BMI1, BRCA1, CBFB, CBX5, CEBPB, CEBPZ, CHD1, CHD2, CHD4, CREM, CTCF, CTCF, CUX1, DHS, DPF2, E2F4, E2F8, E4F1, EBF1, EED, ELF1, ELK1, EP300, EP300, ESRRA, ETS1, ETV6, EZH2, FOXK2, GABPA, GATAD2B, HCFC1, HDAC2, HDGF, IKZF1, IKZF2, IRF4, IRF5, JUNB, JUND, KDM1A, KLF5, MAFK, MAX, MAZ, MEF2A, MEF2B, MEF2C, MLLT1, MTA2, MTA3, MXI1, MYB, NBN, NFATC1, NFIC, NFXL1, NFYA, NFYB, NKRF, NR2C1, NR2C2, NR2F1, NRF1, PAX5, PAX5, PBX3, PKNOX1, POLR2A, POLR2AphosphoS2, POLR2AphosphoS5, RAD21, RBBP5, RCOR1, RELB, REST, RFX5, RUNX3, RXRA, SIN3A, SIX5, SKIL, SMAD1, SMAD5, SMC3, SPI1, SRF, STAT3, STAT5A, TAF1, TBL1XR1, TBP, TBX21, TCF12, TCF7, UBTF, USF1, USF2, WRNIP1, YBX1, YY1, ZBED1, ZBTB40, ZEB1, ZFP36, ZNF143, ZNF217, ZNF24, ZNF384, ZNF592, ZNF622, ZNF687, ZSCAN29, ZZZ3, ATAC-seq, CTCF, H2AFZ, H3K27ac, H3K27me3, H3K36me3, H3K4me1, H3K4me2, |

|      |     |                                                                                                                                                                                                                                                                                                                                                                                                                                                                                                                                                                                                                                                                                                                                                                                                                                                                                                                                                                                                                                     |
|------|-----|-------------------------------------------------------------------------------------------------------------------------------------------------------------------------------------------------------------------------------------------------------------------------------------------------------------------------------------------------------------------------------------------------------------------------------------------------------------------------------------------------------------------------------------------------------------------------------------------------------------------------------------------------------------------------------------------------------------------------------------------------------------------------------------------------------------------------------------------------------------------------------------------------------------------------------------------------------------------------------------------------------------------------------------|
|      |     | H3K4me3, H3K79me2, H3K9ac, H3K9me3, H4K20me1,<br>POLR2A, RAD21, SMC3                                                                                                                                                                                                                                                                                                                                                                                                                                                                                                                                                                                                                                                                                                                                                                                                                                                                                                                                                                |
| K562 | 306 | AGO1, ARHGAP35, ARID1B, ARID2, ARID3A, ASH1L,<br>ATF1, ATF2, ATF3, ATF7, BACH1, BCLAF1, BCOR, BDP1,<br>BHLHE40, BMI1, BRCA1, BRD4, BRD9, BRF1, BRF2,<br>C11orf30, CBFA2T2, CBFA2T3, CBX1, CBX2, CBX3,<br>CBX5, CBX8, CC2D1A, CCAR2, CCNT2, CDC5L, CEBPB,<br>CEBPD, CEBPZ, CHAMP1, CHD1, CHD2, CHD4, CHD7,<br>COPS2, CREB1, CREB3L1, CREBBP, CREM, CSDE1,<br>CTBP1, CTCF, CTCFL, CUX1, DACH1, DDX20, DEAF1,<br>DNMT1, DPF2, DROSHA, E2F1, E2F4, E2F6, E2F7, E2F8,<br>E4F1, EGR1, EHMT2, ELF1, ELF4, ELK1, EP300, ESRRA,<br>ETS1, ETV6, EWSR1, EZH2, FIP1L1, FOS, FOSL1, FOXA1,<br>FOXK2, FOXM1, FUS, GABPA, GABPB1, GATA1, GATA2,<br>GATAD2A, GATAD2B, GMEB1, GTF2B, GTF2F1, GTF3C2,<br>HCFC1, HDAC1, HDAC2, HDAC3, HDAC6, HDGF, HES1,<br>HLTF, HMBOX1, HMGN3, HNRNPH1, HNRNPK,<br>HNRNPL, HNRNPLL, HNRNPUL1, IKZF1, ILF3, IRF2,<br>JUNB, JUND, JUN, KAT2B, KAT8, KDM1A, KDM4B,<br>KDM5B, KHSRP, KLF16, L3MBTL2, LARP7, LEF1, MAFF,<br>MAFK, MAX, MBD2, MCM2, MCM3, MCM5, MCM7,<br>MEF2A, MEIS2, MGA, MIER1, MITF, MLLT1, MNT, MTA1, |

---

MTA2, MTA3, MXI1, MYNN, NBN, NCOA1, NCOA2, NCOA4, NCOA6, NCOR1, NELFE, NEUROD1, NFATC3, NFE2, NFIC, NFRKB, NFXL1, NFYA, NFYB, NKRF, NONO, NR2C1, NR2C2, NR2F1, NR2F2, NR2F6, NR3C1, NUFIP1, PCBP1, PCBP2, PHB2, PHF20, PHF21A, PHF8, PKNOX1, PML, POLR2A, POLR2AphosphoS2, POLR2G, POLR3A, POLR3G, POU5F1, PRDM10, PRPF4, PTBP1, RAD21, RAD51, RB1, RBBP5, RBFOX2, RBM14, RBM15, RBM17, RBM22, RBM25, RBM34, RBM39, RCOR1, REST, RFX1, RFX5, RLF, RNF2, RUNX1, SAFB2, SAFB, SAP30, SETDB1, SFPQ, SIN3A, SIN3B, SIRT6, SIX5, SKIL, SMAD1, SMAD2, SMAD5, SMARCA4, SMARCA5, SMARCB1, SMARCC2, SMARCE1, SMC3, SNIP1, SNRNP70, SOX6, SP1, SP2, SPI1, SREBF1, SRF, SRSF1, SRSF3, SRSF7, SRSF9, STAT5A, SUPT5H, SUZ12, TAF15, TAF1, TAF7, TAL1, TARDBP, TBL1XR1, TBP, TCF7, TCF7L2, TEAD4, THAP1, THRA, TOE1, TRIM24, TRIM25, TRIM28, U2AF1, U2AF2, UBTF, USF1, USF2, WHSC1, XRCC3, XRCC4, XRCC5, YBX1, YY1, ZBED1, ZBTB11, ZBTB33, ZBTB5, ZBTB7A, ZBTB8A, ZC3H11A, ZC3H8, ZEB2, ZFP36, ZFP91, ZHX1, ZKSCAN1, ZMIZ1, ZMYM3, ZNF143, ZNF24, ZNF263, ZNF274, ZNF280A, ZNF282,

---

---

ZNF316, ZNF318, ZNF384, ZNF407, ZNF592, ZNF639,  
ZNF830, ZSCAN29, ZZZ3, ATAC-seq, CTCF, H2AFZ,  
H3K27ac, H3K27me3, H3K36me3, H3K4me1, H3K4me2,  
H3K4me3, H3K79me2, H3K9ac, H3K9me1, H3K9me3,  
H4K20me1, POLR2A, RAD21, SMC3

---
